# Supplementary material for: Nivolumab and brentuximab vedotin with or without bendamustine for R/R Hodgkin lymphoma in children, adolescents, and young adults
Source: PubMed Central journal article supplement — Blood. 2022 Dec 26;141(17):2075–84. doi: 10.1182/blood.2022017118 (PMC10646780; doi:10.1182/blood.2022017118), 2022-12-26
Supplement: BLOOD_BLD-2022-017118-mmc1.pdf [file BLOOD_BLD-2022-017118-mmc1.pdf]

## Supplementary appendix

| <b>Table of contents</b>                                                                                            | <b>Page</b> |
|---------------------------------------------------------------------------------------------------------------------|-------------|
| • Investigator list                                                                                                 | 2           |
| • Supplementary tables                                                                                              | 10          |
| ◦ Supplementary table S1: Risk stratification algorithm for CheckMate 744                                           | 10          |
| ◦ Supplementary table S2: Treatment summary for patients who proceeded to consolidation off protocol                | 11          |
| ◦ Supplementary table S3: Subsequent cancer therapy                                                                 | 13          |
| ◦ Supplementary table S4: Stem cell mobilization summary                                                            | 14          |
| • Supplementary figures                                                                                             | 15          |
| ◦ Supplementary figure S1: Best reduction in SUVmax per BICR in patients who proceeded to consolidation on protocol | 15          |

**Investigator list**

| <b>Principal or sub-investigator</b>                                                                                                                                                                              | <b>Affiliation</b>                                         | <b>Country</b>  | <b>No. of patients enrolled</b> |
|-------------------------------------------------------------------------------------------------------------------------------------------------------------------------------------------------------------------|------------------------------------------------------------|-----------------|---------------------------------|
| Christine Mauz-Koerholz<br>Benjamin Becker<br>Ante Christian Botzen<br>Tamas Farkas<br>Dieter Koerholz<br>Eva Landmann<br>Natascha Stroeter<br>Wilhelm Woessmann                                                  | Uniklinikum Giessen und Marburg                            | Germany         | 6                               |
| Maurizio Mascarin<br>Pietro Bulian<br>Emanuela Chimienti<br>Michele Spina                                                                                                                                         | Cro-Aviano                                                 | Italy           | 4                               |
| Gerard Michel<br>Vincent Barlogis<br>Herve Chambost<br>Catherine Curtillet<br>Claire Galambrun<br>Catherine Mathey<br>Claire Oudin<br>Clemence Roux<br>Isabelle Thuret<br>Blandine Vallentin<br>Sandrine Visentin | Hopital De La Timone                                       | France          | 4                               |
| Auke Beishuizen<br>Friederike Meyer-Wentrup<br>Natasha Katrina Antonia van Eijkelenburg                                                                                                                           | Wilhelmina Pediatric Hospital/University Medical Centre Ut | The Netherlands | 3                               |
| Thierry Leblanc<br>Benoit Brethon                                                                                                                                                                                 | Hopital Robert Debre                                       | France          | 3                               |

Nivolumab + BV for pts aged 5 to 30 y with R/R cHL

---

Anne Flore Derache  
Raymonda Fahd  
Gwenaelle Gueguen  
Lou Le Mouel

---

|                |                             |     |   |
|----------------|-----------------------------|-----|---|
| Kasey J. Leger | Seattle Children's Hospital | USA | 3 |
|----------------|-----------------------------|-----|---|

Catherine Albert  
Colleen Annesley  
Eric J. Chow  
Todd M. Cooper  
Rachel Cortner  
Carol Dean  
Sarah D. Fanizzi  
Stacy Garcia  
Rebecca Gardner  
Russell Geyer  
Rosemary Hadcox  
Douglas S. Hawkins  
Laura Hill  
Genevieve Kelly  
Tyler Garrett Ketterl  
Casey Krein  
Adam Joseph Lamble  
Sarah E.S. Leary  
Jonathan Liaw-Gray  
Nathan Millard  
Kevin Morrison  
Karin Oesterich  
Celeste Funk Oglesby  
Cassie Oh  
Julie Ruggieri Park  
Navin Pinto  
Elyse Rademacher  
Julie Marie Rivers  
Abby R. Rosenberg

---

Nivolumab + BV for pts aged 5 to 30 y with R/R cHL

|                      |                             |                |   |
|----------------------|-----------------------------|----------------|---|
| Ella Mae Santos      |                             |                |   |
| Christiana Smith     |                             |                |   |
| Katherine Tarlock    |                             |                |   |
| Amy Tellinghuisen    |                             |                |   |
| Michelle Ann Ting    |                             |                |   |
| Heidi Ullom          |                             |                |   |
| Nicholas Vitanza     |                             |                |   |
| Victoria Weiss       |                             |                |   |
| Jennifer Wilkes      |                             |                |   |
| Stacy Lorine Cooper  | Johns Hopkins University    | USA            | 3 |
| Patrick Brown        |                             |                |   |
| Allen Chen           |                             |                |   |
| Kenneth J. Cohen     |                             |                |   |
| Alan David Friedman  |                             |                |   |
| Donald Small         |                             |                |   |
| Stephen Daw          | University College Hospital | United Kingdom | 2 |
| Kirit Ardeshta       |                             |                |   |
| Ben Carpenter        |                             |                |   |
| Jonathan Lambert     |                             |                |   |
| Christopher McNamara |                             |                |   |
| Alberto Garaventa    | Irccs Istituto G. Gaslini   | Italy          | 2 |
| Loredana Amoroso     |                             |                |   |
| Massimo Conte        |                             |                |   |
| Carla Manzitti       |                             |                |   |
| Marilina Nantron     |                             |                |   |
| Salvatore Buffardi   | Ao Santobono – Pausilipon   | Italy          | 2 |
| Giovanna Giagnuolo   |                             |                |   |
| Nicoletta Marra      |                             |                |   |
| Rosanna Parasole     |                             |                |   |
| Fara PetruzzIELLO    |                             |                |   |
| Laurence Brugieres   | Institut Gustave Roussy     | France         | 2 |
| Samuel David Abbou   |                             |                |   |

Nivolumab + BV for pts aged 5 to 30 y with R/R cHL

|                           |                                                 |         |  |   |
|---------------------------|-------------------------------------------------|---------|--|---|
| Pablo Berlanga            |                                                 |         |  |   |
| Veronique Minard Colin    |                                                 |         |  |   |
| Stephane Ducassou         |                                                 |         |  |   |
| Brice Fresneau            |                                                 |         |  |   |
| Nathalie Gaspar           |                                                 |         |  |   |
| Lea Guerrini-Rousseau     |                                                 |         |  |   |
| Claudia Pasqualini        |                                                 |         |  |   |
| Dominique Valteau-Couanet |                                                 |         |  |   |
| Christopher Larry Bacon   | St James Hospital                               | Ireland |  | 1 |
| Elisabeth Vandenberghe    |                                                 |         |  |   |
| Maurizio Martelli         | AOU Policlinico Umberto I                       | Italy   |  | 1 |
| Roberto Foa               |                                                 |         |  |   |
| Luisa Cardarelli          |                                                 |         |  |   |
| Gianna Maria D'Elia       |                                                 |         |  |   |
| Maria Luisa Moleti        |                                                 |         |  |   |
| Alessandro Pulsoni        |                                                 |         |  |   |
| Alessandra Serrao         |                                                 |         |  |   |
| Judith Landman-Parker     | Hopital Enfants Armand Trousseau                | France  |  | 1 |
| Helene Boutroux           |                                                 |         |  |   |
| Marie-Laure Colaiacovo    |                                                 |         |  |   |
| Catherine Dollfus         |                                                 |         |  |   |
| Elodie Gouache            |                                                 |         |  |   |
| Sebastien Heritier        |                                                 |         |  |   |
| Guy Leverger              |                                                 |         |  |   |
| Arnaud Petit              |                                                 |         |  |   |
| Mathieu Simonin           |                                                 |         |  |   |
| Marie Dominique Tabone    |                                                 |         |  |   |
| Pascale Tessaro           |                                                 |         |  |   |
| Shannon Mitchell Cohn     | Dell Children's Medical Center of Central Texas | USA     |  | 1 |
| Amy C. Fowler             |                                                 |         |  |   |
| Raven M. Cooksey          |                                                 |         |  |   |
| Virginia L. Harrod        |                                                 |         |  |   |

Nivolumab + BV for pts aged 5 to 30 y with R/R cHL

---

Letitia Holden

Robert Charles Mignacca

Philip E. Neff

Ali Abraham Noorbaksh

Rhea Robinson

Rebecca Swell

Linda G. Shaffer

Ashley Toungate

Donald T. Wells

---

|                  |                           |     |   |
|------------------|---------------------------|-----|---|
| Anderson Collier | University Of Mississippi | USA | 1 |
|------------------|---------------------------|-----|---|

|              |                                                                               |  |  |
|--------------|-------------------------------------------------------------------------------|--|--|
| Tobi Breland | Medical Center/Children's<br>of Mississippi – Gulf Coast<br>Speciality Clinic |  |  |
|--------------|-------------------------------------------------------------------------------|--|--|

Clinton Carroll

Dereck Davis

Sarah Elizabeth Elkin

Maggie Goad

Catherine Gordon

Betty L. Herrington

Erin Audrey Mar Jackson

Hannah Ann Griffi Jordan

Gail C. Megason

Laura Newman

Michele Cara Poliskin

Melissa Mc Naull Rhodes

Jessica Seaborn

---

|                 |                         |         |   |
|-----------------|-------------------------|---------|---|
| Torsten Ebeling | Campus Virchow Klinikum | Germany | 1 |
|-----------------|-------------------------|---------|---|

|               |             |  |  |
|---------------|-------------|--|--|
| Andrej Lissat | Der Charite |  |  |
|---------------|-------------|--|--|

Annette Kuenkele

Johannes Schulte

Anne Thorwarth

Arend Von Stackelberg

---

|            |                     |     |   |
|------------|---------------------|-----|---|
| Kara Kelly | Roswell Park Cancer | USA | 1 |
|------------|---------------------|-----|---|

|                     |                                                                         |  |  |
|---------------------|-------------------------------------------------------------------------|--|--|
| Steven John Amrusko | Institute/Women and<br>Children's Hospital of<br>Buffalo/The Children's |  |  |
|---------------------|-------------------------------------------------------------------------|--|--|

Barbara Jean Bambach

---

Nivolumab + BV for pts aged 5 to 30 y with R/R cHL

---

|                                     |                                    |  |  |
|-------------------------------------|------------------------------------|--|--|
| Matthew John Barth                  | Hospital of Buffalo Kaleida Health |  |  |
| Lynda M. Beaupin                    |                                    |  |  |
| Seema Ali Bhat                      |                                    |  |  |
| Lorna Kathryn Fitzpatrick           |                                    |  |  |
| Francisco J. Hernandez-Ilizaliturri |                                    |  |  |
| Meghan Ann Higman                   |                                    |  |  |
| Shilpa Jain                         |                                    |  |  |
| Kelvin P. Lee                       |                                    |  |  |
| Dheerendra Prasad                   |                                    |  |  |
| Denise Ann Rokitka                  |                                    |  |  |
| Beverly Anne Schaefer               |                                    |  |  |
| Pallawi Torka                       |                                    |  |  |
| Clare J. Twist                      |                                    |  |  |

---

|                          |                                                 |     |   |  |  |
|--------------------------|-------------------------------------------------|-----|---|--|--|
| Peter H. Shaw            | All Children's Hospital<br>Specialty Physicians | USA | 1 |  |  |
| Irmel Ayala              |                                                 |     |   |  |  |
| Rebecca Berger           |                                                 |     |   |  |  |
| Melanie Cross            |                                                 |     |   |  |  |
| Melinda L. Duren         |                                                 |     |   |  |  |
| Shari Lyne Feinberg      |                                                 |     |   |  |  |
| Nanette Grana            |                                                 |     |   |  |  |
| Melanie Raye Haase       |                                                 |     |   |  |  |
| Charles Isaac Hauk       |                                                 |     |   |  |  |
| Kelsey Horner            |                                                 |     |   |  |  |
| Kelly Alexa Lawless      |                                                 |     |   |  |  |
| Britni Looper            |                                                 |     |   |  |  |
| Claudia Lukas            |                                                 |     |   |  |  |
| Jennifer Mayer           |                                                 |     |   |  |  |
| Jonathan Metts           |                                                 |     |   |  |  |
| Colin Evan Moore         |                                                 |     |   |  |  |
| Damon Reed               |                                                 |     |   |  |  |
| Stacie Stapleton         |                                                 |     |   |  |  |
| Jessica Meredith Wishnew |                                                 |     |   |  |  |

---

Nivolumab + BV for pts aged 5 to 30 y with R/R cHL

|                                 |                                                                                                    |     |   |
|---------------------------------|----------------------------------------------------------------------------------------------------|-----|---|
| Martha M. Pacheco               | The University Of<br>Texas/Children's Medical<br>Center                                            | USA | 1 |
| Leah Adix                       |                                                                                                    |     |   |
| Daniel C. Bowers                |                                                                                                    |     |   |
| Cristyn Nicole Branstetter      |                                                                                                    |     |   |
| Kenneth S. Chen                 |                                                                                                    |     |   |
| Marian Hernandez                |                                                                                                    |     |   |
| Laura J. Klesse                 |                                                                                                    |     |   |
| Theodore W. Laetsch             |                                                                                                    |     |   |
| Patrick J. Leavey               |                                                                                                    |     |   |
| Andrew A. Martin                |                                                                                                    |     |   |
| Rachel Nam                      |                                                                                                    |     |   |
| Alison Patterson                |                                                                                                    |     |   |
| Zain Rahimi                     |                                                                                                    |     |   |
| Amanda W. Richards              |                                                                                                    |     |   |
| Michelle Rivas                  |                                                                                                    |     |   |
| Tamra L. Slone                  |                                                                                                    |     |   |
| Shahenaaz Sunderji              |                                                                                                    |     |   |
| Tanya Watt                      |                                                                                                    |     |   |
| Jonathan E. Wickiser            |                                                                                                    |     |   |
| Kathleen Faye Wiertel<br>Ludwig |                                                                                                    |     |   |
| Naomi J. Winick                 |                                                                                                    |     |   |
| Valerie I. Brown                | Penn State Hershey<br>Children's Hospital/Penn<br>State Milton S Hershey<br>Medical Center         | USA | 1 |
| Smita Chandrash<br>Dandekar     |                                                                                                    |     |   |
| Robert J. Greiner               |                                                                                                    |     |   |
| Lisa Mcgregor                   |                                                                                                    |     |   |
| Pooja Rao                       |                                                                                                    |     |   |
| Jacquelyn R. Rencher            |                                                                                                    |     |   |
| Suzanne Treadway                |                                                                                                    |     |   |
| Paul D. Harker-Murray           | Children's Hospital of<br>Wisconsin/Children's<br>Corporate Center/Medical<br>College of Wisconsin | USA | 0 |
| Meghen Browning                 |                                                                                                    |     |   |
| Michael Burke                   |                                                                                                    |     |   |
| Sarah Dobrozsi                  |                                                                                                    |     |   |



Nivolumab + BV for pts aged 5 to 30 y with R/R cHL

---

Rebecca Fetzer

Chris Hennen

Jeffrey Knipstein

Nathan Schloemer

Cindy Lee Schwartz

Ryuma Tanaka

Richard Tower

---

## Supplementary tables

**Supplementary table S1. Risk stratification algorithm for CheckMate 744**

| Stage at diagnosis              | Time to relapse from end of therapy (months) | B symptoms <sup>a</sup> or extranodal disease at relapse, extensive disease where radiation therapy was contraindicated at relapse, or relapse in a prior radiation field |
|---------------------------------|----------------------------------------------|---------------------------------------------------------------------------------------------------------------------------------------------------------------------------|
| <b>Standard risk: R2 cohort</b> |                                              |                                                                                                                                                                           |
| Any                             | <3                                           | Yes/No                                                                                                                                                                    |
| IA, IIA                         | 3–12<br>>3 cycles and/or RT                  | Yes/No                                                                                                                                                                    |
| IB, IIB, IIIA                   | <12                                          |                                                                                                                                                                           |
| IIIB, IV                        | Any                                          | Yes                                                                                                                                                                       |
| Any                             | Any                                          |                                                                                                                                                                           |
| <b>Low risk: R1 cohort</b>      |                                              |                                                                                                                                                                           |
| IA, IIA                         | ≥12                                          | No                                                                                                                                                                        |
|                                 | 3–12<br>≤3 cycles and no RT                  | No                                                                                                                                                                        |
| IB, IIB, IIIA                   | >12                                          | No                                                                                                                                                                        |

<sup>a</sup>B symptoms include fever (≥101 °F or ≥38.3 °C), drenching night sweats, and unexplained weight loss (≥10% of body weight over 6 months).

RT, radiation therapy.

**Supplementary table S2. Treatment summary for patients who proceeded to consolidation off protocol**

| Patient        | Completed treatment                                 | Response after 4 cycles of induction |         | Best response prior to consolidation |         | Off-protocol therapies, auto-HCT, subsequent therapies                                                                                                                                                    |
|----------------|-----------------------------------------------------|--------------------------------------|---------|--------------------------------------|---------|-----------------------------------------------------------------------------------------------------------------------------------------------------------------------------------------------------------|
|                |                                                     | Per BICR                             | Per INV | Per BICR                             | Per INV |                                                                                                                                                                                                           |
| 1              | 4 cycles of induction                               | PMR                                  | CMR     | CMR                                  | CMR     | <ul style="list-style-type: none"> <li>• BEAM (HDCT)</li> <li>• Auto-HCT</li> </ul>                                                                                                                       |
| 2              | 4 cycles of induction                               | PMR                                  | PMR     | CMR                                  | CMR     | <ul style="list-style-type: none"> <li>• Gemcitabine, ifosfamide, prednisolone, vinorelbine (second salvage)</li> <li>• Lomustine, cytarabine, etoposide, melphalan (HDCT)</li> <li>• Auto-HCT</li> </ul> |
| 3 <sup>a</sup> | 4 cycles of induction                               | NE                                   | CMR     | NE                                   | CMR     | <ul style="list-style-type: none"> <li>• BEAM (HDCT)</li> <li>• Auto-HCT</li> </ul>                                                                                                                       |
| 4              | 4 cycles of induction                               | CMR                                  | CMR     | CMR                                  | CMR     | <ul style="list-style-type: none"> <li>• Fotemustine, cytarabine, etoposide, melphalan (HDCT)</li> <li>• Auto-HCT</li> </ul>                                                                              |
| 5              | 4 cycles of induction + 4 cycles of intensification | PMR                                  | PMR     | PMR                                  | CMR     | <ul style="list-style-type: none"> <li>• BEAM (HDCT)</li> <li>• Auto-HCT</li> <li>• Surgery</li> </ul>                                                                                                    |
| 6              | 4 cycles of induction                               | PMR                                  | CMR     | PMR                                  | CMR     | <ul style="list-style-type: none"> <li>• BEAM (HDCT)</li> <li>• Auto-HCT</li> </ul>                                                                                                                       |
| 7              | 4 cycles of induction                               | CMR                                  | CMR     | CMR                                  | CMR     | <ul style="list-style-type: none"> <li>• BEAM (HDCT)</li> <li>• Auto-HCT</li> </ul>                                                                                                                       |
| 8              | 4 cycles of induction                               | PMD                                  | PMR     | CMR                                  | PMR     | <ul style="list-style-type: none"> <li>• Ifosfamide, carboplatin, etoposide (second salvage)</li> <li>• Auto-HCT</li> </ul>                                                                               |

Nivolumab + BV for pts aged 5 to 30 y with R/R cHL

|                |                       |    |    |    |    |                                                                                                                                                                       |
|----------------|-----------------------|----|----|----|----|-----------------------------------------------------------------------------------------------------------------------------------------------------------------------|
| 9 <sup>b</sup> | 2 cycles of induction | NR | NR | NR | NR | <ul style="list-style-type: none"><li>• Bendamustine (second salvage)</li><li>• BEAM (HDCT)</li><li>• Auto-HCT</li><li>• BV (post-transplant immunotherapy)</li></ul> |
|----------------|-----------------------|----|----|----|----|-----------------------------------------------------------------------------------------------------------------------------------------------------------------------|

---

<sup>a</sup>This patient was not evaluable for response because he/she did not achieve PMR or CMR per BICR at any time, or completion of 6 cycles of therapy (4 cycles of nivolumab plus BV and 2 cycles of BV plus bendamustine).

<sup>b</sup>This patient discontinued after 2 cycles of induction due to toxicity, but was evaluable for response.

BEAM, carmustine, cytarabine, etoposide, and melphalan; INV, investigator; NE, not evaluable; NR, no response; PMD, progressive metabolic disease.

**Supplementary table S3. Subsequent cancer therapy**

|                                                                                            | <b>R2 cohort<br/>(n=44)</b> |
|--------------------------------------------------------------------------------------------|-----------------------------|
| Any subsequent therapy <sup>a</sup>                                                        | 27 (61.4)                   |
| Radiation therapy <sup>b</sup>                                                             | 9 (20.5)                    |
| Curative intent                                                                            | 2 (4.5)                     |
| Other <sup>c</sup>                                                                         | 7 (15.9)                    |
| Systemic therapy                                                                           | 21 (47.7)                   |
| Reason for subsequent systemic therapy                                                     |                             |
| Maintenance with BV after auto-HCT (without disease progression or clinical deterioration) | 10 (22.7)                   |
| Disease progression                                                                        | 3 (6.8)                     |
| Other/not reported                                                                         | 9 (20.5)                    |

Data are n (%).

<sup>a</sup>Patients could receive a combination of therapies.

<sup>b</sup>Eight patients received radiation therapy as consolidation after auto-HCT; 1 patient received radiation therapy as a subsequent therapy after progression.

<sup>c</sup>Other reasons included local consolidation, standard of care, and follow-up treatment.

Auto-HCT, autologous hematopoietic cell transplantation; BV, brentuximab vedotin.

**Supplementary table S4. Stem cell mobilization summary**

|                                                                                                    | <b>R2 cohort<br/>(n=40)</b> |
|----------------------------------------------------------------------------------------------------|-----------------------------|
| Median (range) number of apheresis sessions per patient                                            | 1.0 (1–5)                   |
| Median (range) number of CD34+ cells collected per session, $\times 10^6$ cells/kg (n=59 sessions) | 4.0 (0.3–268.0)             |
| Mobilization agents ( $\geq 2$ patients), n (%)                                                    |                             |
| G-CSF <sup>a</sup>                                                                                 | 22 (55)                     |
| Plerixafor                                                                                         | 4 (10.0)                    |
| Calcium                                                                                            | 3 (7.5)                     |
| Carmustine                                                                                         | 2 (5.0)                     |
| Cyclophosphamide                                                                                   | 2 (5.0)                     |
| Cytarabine                                                                                         | 2 (5.0)                     |
| Etoposide                                                                                          | 2 (5.0)                     |
| Melphalan                                                                                          | 2 (5.0)                     |

<sup>a</sup>Includes filgrastim, G-CSF, and lenograstim.

G-CSF, granulocyte colony stimulating factor.
